# Supplementary material for: Optical sensing of l-dihydroxy-phenylalanine in water by a high-affinity molecular receptor involving cooperative binding of a metal coordination bond and boronate–diol
Source: Royal Society of Chemistry journal article supplement (doi:10.1039/d4dt02108h), 2024-01-01
Supplement: d4dt02108h1.pdf [file d4dt02108h1.pdf]

# Optical Sensing of L-dihydroxy-phenylalanine in Water by a High-affinity Molecular Receptor Involving a Cooperative Bind of Metal Coordination Bond and Boronate-Diol

María K. Salomón-Flores,<sup>a</sup> Alejandro O. Viviano-Posadas,<sup>a</sup> Josue Valdes-García,<sup>a</sup> Víctor López-Guerrero,<sup>a</sup>  
Diego Martínez-Otero,<sup>ab</sup> Joaquín Barroso-Flores,<sup>ab</sup> Juan M. German-Acacio,<sup>c</sup> Iván J. Bazany-Rodríguez,<sup>d</sup> and  
Alejandro Dorazco-González<sup>\*a</sup>

<sup>a</sup> Institute of Chemistry, National Autonomous University of Mexico, Ciudad Universitaria, México, 04510, CDMX, México.

<sup>b</sup> Centro Conjunto de Investigación en Química Sustentable, UAEM-UNAM, Carretera Toluca-Atlacomulco Km 14.5, C. P. 50200, Toluca, Estado de México, México, Instituto de Química, Universidad Nacional Autónoma de México.

<sup>c</sup> Red de Apoyo a la Investigación, Coordinación de la Investigación Científica-UNAM, Instituto Nacional de Ciencias Médicas y Nutrición SZ, Ciudad de México, CP 14000, México

<sup>d</sup> Facultad de Química, Universidad Nacional Autónoma de México, Ciudad Universitaria CDMX, 04510 México.

## Electronic Supporting Information

|                  |                                                                                                                  |
|------------------|------------------------------------------------------------------------------------------------------------------|
| <b>Scheme S1</b> | Synthesis of Cu(II)-complexes used in this work.                                                                 |
| <b>Table S1</b>  | Crystallographic data and structure refinement for <b>1</b> and <b>2</b> .                                       |
| <b>Table S2</b>  | Hydrogen Bonds for <b>1</b> [Å and °].                                                                           |
| <b>Table S3</b>  | Hydrogen Bonds for <b>2</b> [Å and °].                                                                           |
| <b>Table S4</b>  | Selected bond distances (Å) and angles (°) for boron and copper atoms in crystal <b>1</b> .                      |
| <b>Table S5</b>  | Selected bond distances (Å) and angles (°) for copper atom in crystal <b>2</b> .                                 |
| <b>Table S6</b>  | Boronic acid-based molecular receptors for Levodopa.                                                             |
| <b>Fig. S1</b>   | <sup>1</sup> H NMR spectrum of <b>1</b> in DMSO- <i>d</i> <sub>6</sub> .                                         |
| <b>Fig. S2</b>   | <sup>13</sup> C NMR spectrum of <b>1</b> in DMSO- <i>d</i> <sub>6</sub> .                                        |
| <b>Fig. S3</b>   | <sup>1</sup> H NMR spectrum of <b>L</b> <sup>1</sup> in DMSO- <i>d</i> <sub>6</sub> .                            |
| <b>Fig. S4</b>   | <sup>13</sup> C NMR spectrum of <b>L</b> <sup>1</sup> in DMSO- <i>d</i> <sub>6</sub> .                           |
| <b>Fig. S5</b>   | <sup>1</sup> H NMR spectrum of <b>L</b> <sup>2</sup> in DMSO- <i>d</i> <sub>6</sub> .                            |
| <b>Fig. S6</b>   | <sup>13</sup> C NMR spectrum of <b>L</b> <sup>2</sup> in DMSO- <i>d</i> <sub>6</sub> .                           |
| <b>Fig. S7</b>   | Positive scan of high-resolution ESI mass spectrum of <b>CuL</b> <sup>1</sup> .                                  |
| <b>Fig. S8</b>   | Positive scan of ESI mass spectrum of <b>CuL</b> <sup>2</sup> .                                                  |
| <b>Fig. S9</b>   | IR (ATR) spectrum of <b>CuL</b> <sup>1</sup> .                                                                   |
| <b>Fig. S10</b>  | IR (ATR) spectrum of <b>CuL</b> <sup>2</sup> .                                                                   |
| <b>Fig. S11</b>  | Crystal packing ORTEP perspectives of complexes <b>CuL</b> <sup>1</sup> and <b>CuL</b> <sup>2</sup> .            |
| <b>Fig. S12</b>  | Fluorescence emission spectra of <b>L</b> <sup>1</sup> and <b>CuL</b> <sup>1</sup> in buffered water at pH= 7.4. |
| <b>Fig. S13</b>  | Absorption and fluorescence emission spectra of <b>CuL</b> <sup>1</sup> in buffered water at pH= 7.4.            |
| <b>Fig. S14</b>  | Absorption and fluorescence emission spectra of <b>CuL</b> <sup>2</sup> in buffered water at pH= 7.4.            |
| <b>Fig. S15</b>  | Changes of emission spectra of aqueous solutions of <b>CuL</b> <sup>2</sup> upon the addition of Levodopa.       |

## General Conditions:

Reagents and solvents were purchased as reagent grades and used without further purification.

2-acetylpyridine (Aldrich, 99%), potassium hydroxide (pellets, Tecsiquim, >85.0%), 4-isoquinolinecarboxaldehyde (Aldrich, 97%), 3-(bromomethyl)phenylboronic acid (Aldrich, 90%), ethanol (Tecsiquim, >99.5%), acetonitrile (Tecsiquim, 99.5%), ammonium hydroxide solution (Aldrich, 29.50%), ethyl acetate (Aldrich, >99.5%), ethyl ether (Tecquisim, >99%), benzyl bromide (Aldrich, 98%), copper bromide (Aldrich, 99%), 3,4-dihydroxy-L-phenylalanine (Aldrich, >98%), L-tyrosine (Aldrich, >98%), epinephrine (Aldrich, >98%), dopamine (Aldrich, >98%), uronic acid (Aldrich, >98%), CD<sub>3</sub>OD (Aldrich, >99%), dimethyl sulfoxide-d<sub>6</sub> (Aldrich, 99.5%), 3-(N-Morpholino)propanesulfonic acid, MOPS (Aldrich, 99.5%), sodium hydroxide (Tecsiquim, 97 %), deionized water. MOPS buffer solution (10 mM, pH 7.4) was prepared with deionized water. A stock solutions of corresponding Cu (II)-complex 1.0 mM, were made with acetonitrile.

Fluorescence and UV-Vis spectra were recorded on an Agilent Cary Eclipse fluorimeter and an Agilent Cary 100 spectrophotometer, respectively, both equipped with a thermostated cell holder at 25°C (±0.1). The source for Cary Eclipse was a 75W Xenon short arc lamp.

Fluorescence lifetime measurements: A Time Correlated Single Photon Counting (TCSPC) system coupled to a custom-built confocal microscope was used to acquire the fluorescence lifetimes. A 354 nm picosecond laser pulsed at 10 MHz (LDH-DC-405, PicoQuant) was focused into a 1 cm quartz cell with a 0.85 NA microscope objective. The fluorescence collected with the same objective passed through a 366 nm long-pass dichroic mirror (Chroma T510lpxrxt), a 364 nm notch filter (Chroma ZET405nf), and a 425 nm long pass emission filter (Chroma ET425lp) and was focused to an avalanche photodiode (PD-050-CTE, MPD). The laser controller (PDL-800-D, PicoQuant) and the APD were connected to a TCSPC card (PicoHarp 300, PicoQuant). The power of irradiation was controlled to obtain less than 1% of the detection events in order to avoid pile-up effects on the recorded histogram. Allura Red (analytical standard Sigma-Aldrich) was used to obtain the IRF under the same conditions of irradiation. All data were obtained and treated in SymphoTime 64 software (PicoQuant).<sup>66</sup>

<sup>1</sup>H and <sup>13</sup>C NMR spectra were recorded on a Bruker Advance DPX 400 spectrometer at 400, 100 MHz respectively.

<sup>11</sup>B NMR spectra were recorded on a Bruker Advance at 96 MHz and are reported in parts per million with respect to BF<sub>3</sub>OEt<sub>2</sub> (δ=0).

High-Resolution Electrospray Ionization mass with positive scan spectra for FGH and **3Zn** were obtained with a Bruker Micro TOF II.

Electrospray Ionization mass spectrum with positive and negative scan for all synthesized molecules were obtained with a Waters CapLCcoupled Micromass Q-ToF Ultima ESI-instrument.

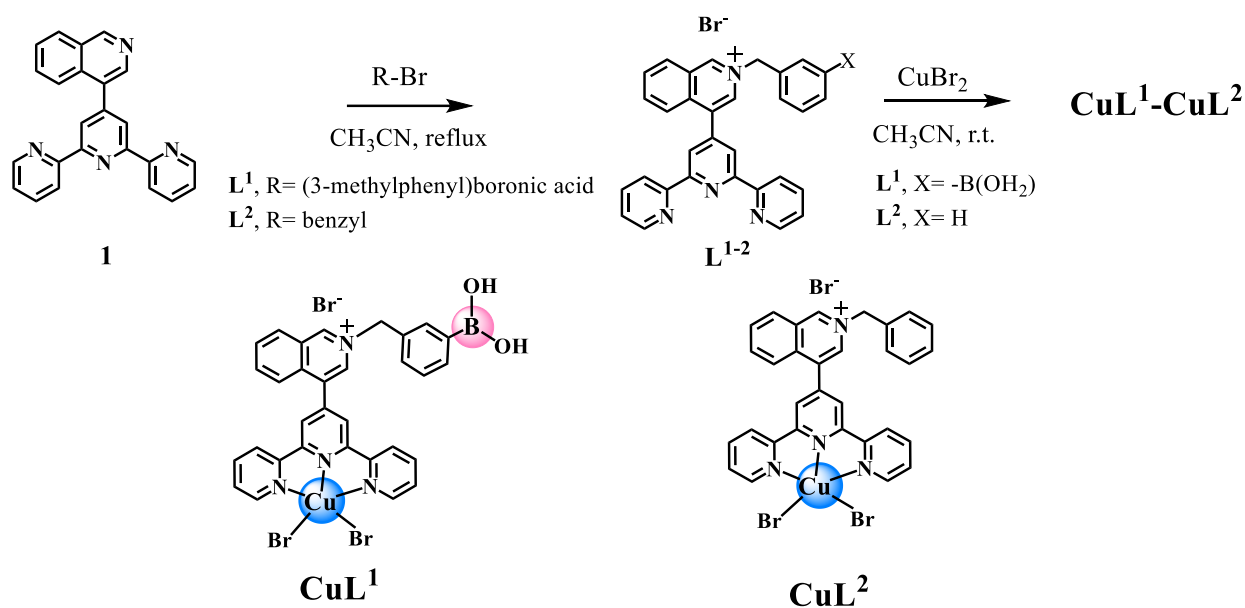

**Scheme S1.** Synthesis of Cu-complexes-based used in this work.

## Chemical Synthesis

**Synthesis of compound 1:** 4-([2,2':6',2''-terpyridin]-4'-yl)isoquinoline. 2-acetylpyridine (250.3 mg, 232.0  $\mu\text{L}$ , 2.04 mmol) was dissolved in an ethanolic solution (60.0 ml) of KOH (500.0 mg, 8.90 mmol) in a balloon flask and it was vigorously stirred for 10.0 min., separately, 4-isoquinolinecarboxaldehyde (164.01 mg, 1.04 mmol) was dissolved in EtOH (10.0 mL) and added drop by drop to the 2-acetylpyridine basic solution. The mixture reaction was stirred for  $\sim 20$  min. at r. t., then, aqueous  $\text{NH}_3$  (10.5 ml, 12.5 mmol, 29.50%) was added and refluxed for 48 h. under a  $\text{N}_2$  atmosphere. The solvent was reduced under vacuum up to  $\sim 20$  % of the initial volume and cold distilled water (100.0 mL) was added to give a precipitate. This precipitate was filtered off, washed with water twice (25.0 mL) and recrystallized in EtOH to obtain **1** as white crystalline powder. Yield: 242.0 mg (65.0 %).

$^1\text{H}$  NMR (300 MHz, 25  $^\circ\text{C}$ ,  $\text{CDCl}_3$ )  $\delta$  9.33 (s, 1H), 8.73 (dt,  $J = 7.99, 1.09$  Hz, 2H), 8.69 (ddd,  $J = 4.80, 1.81, 0.93$  Hz, 2H), 8.66 (s, 2H), 8.64 (s, 1H), 8.10-8.07 (m, 1H), 8.00-7.97 (m, 1H), 7.91 (td,  $J = 7.85$  Hz, 7.75, 1.81 Hz, 2H), 7.74–7.68 (m, 2H), 7.36 (ddd,  $J = 7.50, 4.77, 1.22$  Hz, 2H)

$^{13}\text{C}$  NMR (75 MHz, 25  $^\circ\text{C}$ ,  $\text{CDCl}_3$ )  $\delta$  155.97, 155.86, 153.06, 149.25, 147.23, 142.77, 136.93, 133.64, 131.30, 131.13, 128.31, 128.05, 127.47, 124.41, 123.99, 122.24, 121.42.

EI-MS ( $m/z$ ): calculated for  $[\text{C}_{24}\text{H}_{15}\text{N}_4]^+$ , 359.13; found, 359.00.

**Synthesis of ligand L<sup>1</sup>:** 4'-[N-(3-boronobenzyl)-4-isoquinolinium] 2,2':6',2''-terpyridine bromide. **1** (50.0 mg, 0.14 mmol) and 1.10 equiv of 3-(bromomethyl)phenylboronic acid (36.47 mg, 0.19 mmol) were dissolved in anhydrous CH<sub>3</sub>CN (70 mL) and refluxed for 72 h with a N<sub>2</sub> atmosphere. Then, the solvent was removed under reduced pressure and ethyl acetate (40 mL) was added. The mixture was stirred for 5 h. Finally, the solid was filtered off, washed with Et<sub>2</sub>O twice (5 mL) and dried under vacuum for ~ 3 h. to give **L1** as white powder. Yield: 71.82 mg, (90.0 %).

<sup>1</sup>H NMR (301 MHz, 25°C, DMSO-*d*<sub>6</sub>) δ 10.39 (s, 1H), 9.19 (d, *J*=1.33 Hz, 1H), 8.76–8.69(m, 5H), 8.66 (s, 2H), 8.32–8.26 (m, 1H), 8.21–8.12 (m, 4H), 8.08 (td, *J*=7.72, 1.81 Hz, 2H), 7.97 (s, 1H), 7.84 (dt, *J*=7.39, 1.23 Hz, 1H), 7.69 (dt, *J*=7.82, 1.51 Hz, 1H), 7.55 (ddd, *J*=7.58, 4.77, 1.24 Hz, 2H), 7.43 (t, *J*=7.54 Hz, 1H), 6.07 (s, 2H).

<sup>13</sup>C NMR (101 MHz, 25°C, DMSO-*d*<sub>6</sub>) δ 155.77, 154.41, 150.21, 149.52, 143.34, 138.17, 137.82, 136.28, 135.22, 134.97, 134.57, 134.39, 133.35, 131.63, 131.53, 130.59, 128.60, 128.34, 127.90, 125.04, 124.83, 121.67, 121.24, 63.78.

HRMS-ESI<sup>+</sup> (*m/z*): calculated for [C<sub>31</sub>H<sub>24</sub>BN<sub>4</sub>O<sub>2</sub>]<sup>+</sup>: 495.20, found: 495.20453. ATR-IR ν (cm<sup>-1</sup>): 3300(m), 2926(m), 1584(m), 1449(m), 1352(m), 1096–1030(m).

**Synthesis of ligand L<sup>2</sup>,** 4'-[N-(benzyl)-4-isoquinolinium]-2,2':6',2''-terpyridine bromide. **1** (50.0 mg, 0.14 mmol) and 10.0 equiv. of benzyl bromide (168.13.0 μL, 1.4 mmol) were dissolved in anhydrous CH<sub>3</sub>CN (70 mL) and refluxed for 24 h. with a N<sub>2</sub> atmosphere. The solvent was removed under reduced pressure, ethyl acetate (40.0 mL) was added it was left stirring for ~ 5 h. at r.t. The solid was filtered under vacuum and crystallized in an EtOH-acetone (1:1, v/v) system, obtaining white needle-shaped crystals. Yield: 55.86 mg (70 %).

<sup>1</sup>H NMR (300 MHz, 25 °C, DMSO-*d*<sub>6</sub>) δ (ppm) 10.40 (s, 1H), 9.22 (s, 1H), 8.78–8.72 (m, 5H), 8.68 (s, 2H), 8.30 (ddd, *J*=8.41, 6.79, 1.34 Hz, 1H), 8.18 (dd, *J*=8.05, 1.13 Hz, 2H), 8.10 (td, *J*=7.73, 1.83 Hz, 2H), 7.68–7.65 (m, 2H), 7.57 (ddd, *J*=7.52, 4.76, 1.20 Hz, 2H), 7.49–7.42 (m, 3H), 6.07 (s, 2H).

<sup>13</sup>C NMR (75 MHz, 25°C, DMSO-*d*<sub>6</sub>) δ 155.61, 154.27, 150.19, 149.38, 143.31, 138.12, 137.88, 136.23, 135.18, 134.45, 134.30, 131.57, 131.47, 129.35, 129.20, 128.96, 127.84, 125.03, 124.76, 121.70, 121.26, 63.43. (two signals were not detected).

ESI<sup>+</sup>-MS (*m/z*): calculated for [C<sub>31</sub>H<sub>23</sub>N<sub>4</sub>]<sup>+</sup>: 451.19, found: 452.351. ATR-IR ν (cm<sup>-1</sup>): 3035(m), 1584(m), 1399(m).

**Table S1.** Crystallographic data and structure refinement for **CuL<sup>1</sup>** and **CuL<sup>2</sup>**.

| Crystal data                                     | CuL <sup>1</sup>                                                                                       | CuL <sup>2</sup>                                                                |
|--------------------------------------------------|--------------------------------------------------------------------------------------------------------|---------------------------------------------------------------------------------|
| Empirical formula                                | C <sub>33</sub> H <sub>27</sub> BBr <sub>2.54</sub> Cl <sub>3.46</sub> CuN <sub>4</sub> O <sub>2</sub> | C <sub>31</sub> H <sub>29</sub> Br <sub>3</sub> CuN <sub>4</sub> O <sub>3</sub> |
| Formula weight (g mol <sup>-1</sup> )            | 911.55                                                                                                 | 808.85                                                                          |
| Temperature (K)                                  | 100(2)                                                                                                 | 100(2)                                                                          |
| Wavelength                                       | 1.54178 Å                                                                                              | 0.71073                                                                         |
| Crystal system                                   | Monoclinic                                                                                             | Monoclinic                                                                      |
| Space group                                      | P2 <sub>1</sub> /n                                                                                     | P2 <sub>1</sub> /c                                                              |
| a (Å)                                            | 10.4148(2)                                                                                             | 17.1481(8)                                                                      |
| b (Å)                                            | 13.5810(3)                                                                                             | 14.9862(7)                                                                      |
| c (Å)                                            | 25.1875(5)                                                                                             | 12.3646(6)                                                                      |
| α (°)                                            | 90                                                                                                     | 90                                                                              |
| β (°)                                            | 99.6130(10)                                                                                            | 107.1466(9)                                                                     |
| γ = 90°                                          | 90                                                                                                     | 90                                                                              |
| Volume (Å <sup>3</sup> )                         | 3512.58(12)                                                                                            | 3036.3(2)                                                                       |
| Z                                                | 4                                                                                                      | 4                                                                               |
| Density calculated (mg/m <sup>3</sup> )          | 1.724                                                                                                  | 1.769                                                                           |
| Absorption coefficient (mm <sup>-1</sup> )       | 6.987                                                                                                  | 4.707                                                                           |
| F(000)                                           | 1803                                                                                                   | 1604                                                                            |
| Crystal size (mm <sup>3</sup> )                  | 0.166 x 0.144 x 0.127                                                                                  | 0.264 x 0.158 x 0.075                                                           |
| Theta range for data collection (°)              | 3.559 to 71.905                                                                                        | 2.195 to 27.445                                                                 |
| Index ranges                                     | -12<=h<=12, 0<=k<=16, 0<=l<=31                                                                         | -22<=h<=22, -19<=k<=19, -16<=l<=16                                              |
| Reflections collected                            | 6649                                                                                                   | 65302                                                                           |
| Independent reflections                          | 6649 [R(int) = ?]                                                                                      | 6938 [R(int) = 0.0358]                                                          |
| Completeness to theta                            | 67.679°<br>97.4 %                                                                                      | 25.242°<br>100.0 %                                                              |
| Refinement method                                | Full-matrix least-squares on F <sup>2</sup>                                                            | Full-matrix least-squares on F <sup>2</sup>                                     |
| Data / restraints / parameters                   | 6649 / 4 / 434                                                                                         | 6938 / 24 / 407                                                                 |
| Goodness-of-fit on F <sup>2</sup>                | 1.033                                                                                                  | 1.040                                                                           |
| Final R indices [I>2σ(I)]                        | R1 = 0.0489, wR2 = 0.1393                                                                              | R1 = 0.0294, wR2 = 0.0759                                                       |
| R indices (all data)                             | R1 = 0.0541, wR2 = 0.1456                                                                              | R1 = 0.0346, wR2 = 0.0789                                                       |
| Extinction coefficient                           | n/a                                                                                                    | n/a                                                                             |
| Largest diff. peak and hole (e.Å <sup>-3</sup> ) | 1.596 and -0.665                                                                                       | 2.409 and -1.563                                                                |

**Table S2.** Hydrogen Bonds for **CuL<sup>1</sup>** [Å and °].

| D-H...A           | d(D-H)    | d(H...A)  | d(D...A) | <(DHA) |
|-------------------|-----------|-----------|----------|--------|
| O(1)-H(1)...Br(2) | 0.852(17) | 2.554(13) | 3.358(3) | 158(3) |

**Table S3.** Hydrogen Bonds for **CuL<sup>2</sup>** [Å and °]

| D-H...A                                         | d(D-H)     | d(H...A)  | d(D...A)  | <(DHA)  |
|-------------------------------------------------|------------|-----------|-----------|---------|
| O(2)-H(2A)...Br(2)                              | 0.834(10)  | 2.640(11) | 3.471(2)  | 174(4)  |
| O(2)-H(2B)...Br(2)#1                            | 0.834(10)  | 2.585(16) | 3.390(2)  | 162(4)  |
| O(1)-H(1A)...Br(3)#2                            | 0.843(10)  | 2.67(2)   | 3.477(3)  | 160(5)  |
| O(1)-H(1B)...Br(3)#1                            | 0.845(10)  | 2.716(17) | 3.540(3)  | 165(5)  |
| O(3 <sup>a</sup> )-H(3A <sup>a</sup> )...O(2)   | 0.8401(10) | 2.112(9)  | 2.915(7)  | 160(3)  |
| O(3 <sup>a</sup> )-H(3B <sup>a</sup> )...Br(3)  | 0.8400(11) | 2.67(5)   | 3.400(7)  | 145(7)  |
| O(3A <sup>b</sup> )-H(3C <sup>b</sup> )...O(2)  | 0.845(10)  | 2.107(9)  | 2.943(10) | 170(7)  |
| O(3A <sup>b</sup> )-H(3D <sup>b</sup> )...Br(3) | 0.839(10)  | 2.55(6)   | 3.281(9)  | 147(10) |

Symmetry transformations used to generate equivalent atoms:

#1 -x+1,-y+1,-z                    #2-x+1,y-1/2,-z+1/2

**Table S4.** Selected bond distances (Å) and angles (°) for boron and copper atoms in crystal **CuL<sup>1</sup>**.

| 1               |           |                   |            |
|-----------------|-----------|-------------------|------------|
| O(1)-B(1)       | 1.357(6)  | N(1)-Cu(1)-N(2)   | 78.68(13)  |
| O(2)-B1         | 1.361(6)  | N(3)-Cu(1)-N(2)   | 157.25(13) |
| C(28)-B(1)      | 1.570(6)  | N(1)-Cu(1)-Cl(4)  | 149.5(4)   |
| O(1)-B(1)-O(2)  | 119.0(4)  | N(3)-Cu(1)-Cl(4)  | 96.3(4)    |
| O(1)-B(1)-C(28) | 123.7(4)  | N(2)-Cu(1)-Cl(4)  | 98.9(4)    |
| O(2)-B(1)-C(28) | 117.3(4)  | N(1)-Cu(1)-Br(4)  | 149.80(16) |
| Br(1)-Cu(1)     | 2.5981(7) | N(3)-Cu(1)-Br(4)  | 97.75(15)  |
| Br(4)-Cu(1)     | 2.375(3)  | N(2)-Cu(1)-Br(4)  | 97.49(15)  |
| Cl(4)-Cu(1)     | 2.138(9)  | N(1)-Cu(1)-Br(1)  | 103.35(10) |
| Cu(1)-N(1)      | 1.956(3)  | N(3)-Cu(1)-Br(1)  | 95.86(10)  |
| Cu(1)-N(3)      | 2.042(3)  | N(2)-Cu(1)-Br(1)  | 95.76(9)   |
| Cu(1)-N(2)      | 2.051(3)  | Cl(4)-Cu(1)-Br(1) | 107.1(4)   |
| N(1)-Cu(1)-N(3) | 79.64(13) | Br(4)-Cu(1)-Br(1) | 106.84(13) |

**Table S5.** Selected bond distances (Å) and angles (°) for copper atom in crystal **CuL<sup>2</sup>**.

| 2                 |             |
|-------------------|-------------|
| Br(1)-Cu(1)       | 2.3580(4)   |
| Br(2)-Cu(1)       | 2.6536(4)   |
| Cu(1)-N(1)        | 1.951(2)    |
| Cu(1)-N(2)        | 2.035(2)    |
| Cu(1)-N(3)        | 2.044(2)    |
| N(1)-Cu(1)-N(2)   | 79.52(8)    |
| N(1)-Cu(1)-N(3)   | 79.38(8)    |
| N(2)-Cu(1)-N(3)   | 156.29(8)   |
| N(1)-Cu(1)-Br(1)  | 162.43(6)   |
| N(2)-Cu(1)-Br(1)  | 98.52(6)    |
| N(3)-Cu(1)-Br(1)  | 98.32(6)    |
| N(1)-Cu(1)-Br(2)  | 93.82(6)    |
| N(2)-Cu(1)-Br(2)  | 94.72(6)    |
| N(3)-Cu(1)-Br(2)  | 97.35(6)    |
| Br(1)-Cu(1)-Br(2) | 103.749(13) |

**Table S6.** Boronic acid-based molecular receptors for Levodopa.

| Molecular receptor                         | Signal   | Apparent binding constant (M <sup>-1</sup> ) | Media                               | Ref.      |
|--------------------------------------------|----------|----------------------------------------------|-------------------------------------|-----------|
| Boronic acid appended Zn(II)-porphyrin     | UV-vis   | 1.9 × 10 <sup>4</sup>                        | CH <sub>3</sub> OH-H <sub>2</sub> O | 1         |
| Boronic acid appended lucifer yellow dye   | Turn-off | 1.6 × 10 <sup>3</sup>                        | H <sub>2</sub> O                    | 2         |
| Boronic acid appended quinoline derivative | Turn-off | 1.4 × 10 <sup>3</sup>                        | H <sub>2</sub> O                    | 3         |
| Boronic acid appended perylene derivative  | UV-vis   | 3.2 × 10 <sup>4</sup>                        | H <sub>2</sub> O                    | 4         |
| Boronic acid appended Zn(II)-terpy         | Turn-off | 1.0 × 10 <sup>6</sup>                        | H <sub>2</sub> O                    | 5         |
| <b>CuL<sup>1</sup></b>                     | Tun-off  | 4.7 × 10 <sup>6</sup>                        | H <sub>2</sub> O                    | This work |

- (1) Imada, T.; Kijima, H.; Takeuchi, M.; Shinkai, S. Selective Binding of Glucose-6-Phosphate, 3,4-Dihydroxyphenylalanine (DOPA) and Their Analogs with a Boronic-Acid-Appended Metalloporphyrin. *Tetrahedron* **1996**, *52* (8), 2817–2826. [https://doi.org/10.1016/0040-4020\(96\)00003-8](https://doi.org/10.1016/0040-4020(96)00003-8).
- (2) Coskun, A.; Akkaya, E. U. Three-Point Recognition and Selective Fluorescence Sensing of L-DOPA. *Org. Lett.* **2004**, *6* (18), 3107–3109. <https://doi.org/10.1021/ol0488744>.
- (3) Wu, Z.; Yang, X.; Xu, W.; Wang, B.; Hao, F. A New Boronic Acid-Based Fluorescent Sensor for L-Dihydroxy-Phenylalanine. *Drug Discov. Ther.* **2011**, *6* (5), 238–241. <https://doi.org/10.5582/ddt.2012.v6.5.238>.
- (4) Chen, X. X.; Wu, X.; Zhang, P.; Zhang, M.; Song, B. N.; Huang, Y. J.; Li, Z.; Jiang, Y. B. Multicomponent Covalent Dye Assembly for Tight Binding and Sensitive Sensing of L-DOPA. *Chem. Comm.* **2015**, *51* (71), 13630–13633. <https://doi.org/10.1039/c5cc03495g>.
- (5) Iván J. Bazany-Rodríguez, María K. Salomón-Flores, Alejandro O. Viviano-Posadas, Marco A. García-Eleno, J. B.-F.; Diego Martínez-Oteroc and Alejandro Dorazco-González. Chemosensing of Neurotransmitters with Selectivity and Naked Eye Detection of L-DOPA Based on Fluorescent Zn(II)-Terpyridine Bearing Boronic Acid Complexes. *Dalt. Trans* **2021**, *50*, 4255–4269. <https://doi.org/10.1039/d0dt04228e>.

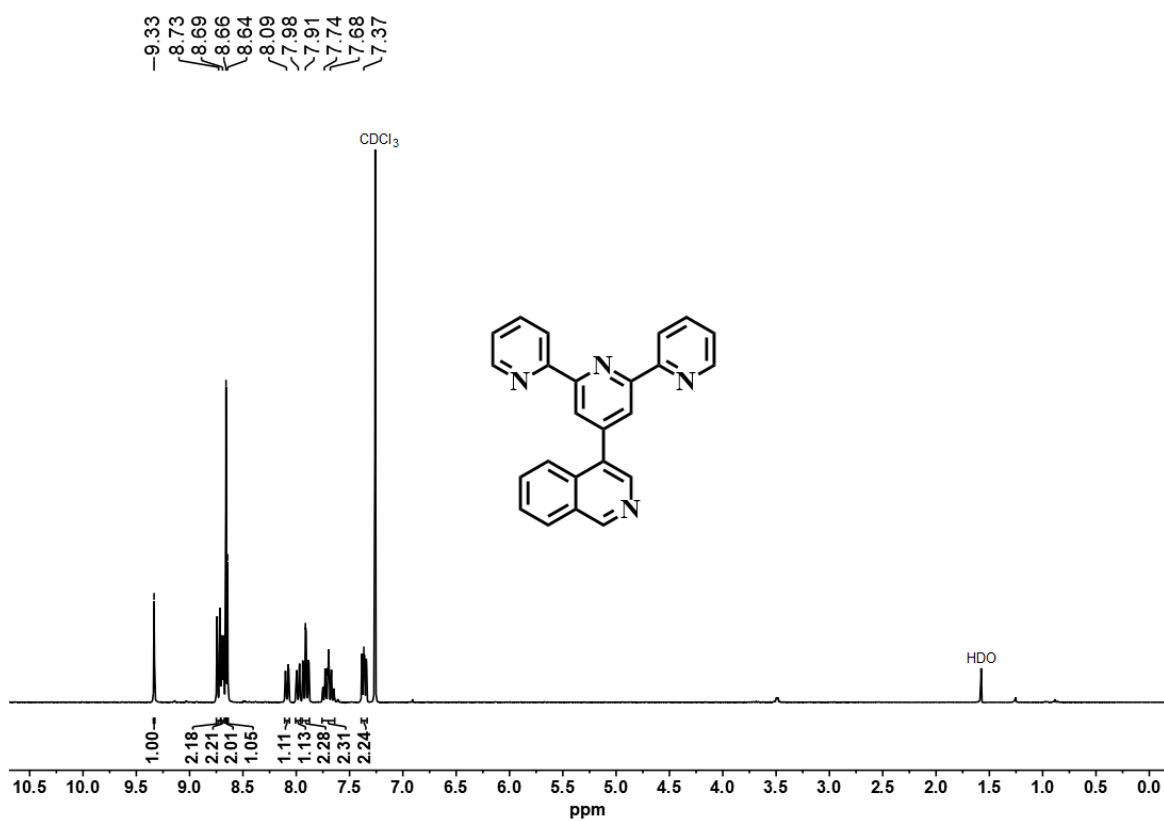

**Fig. S1.** <sup>1</sup>H NMR (300 MHz, 25°C) spectrum of **terpy-4-isoquinoline** in CDCl<sub>3</sub>.

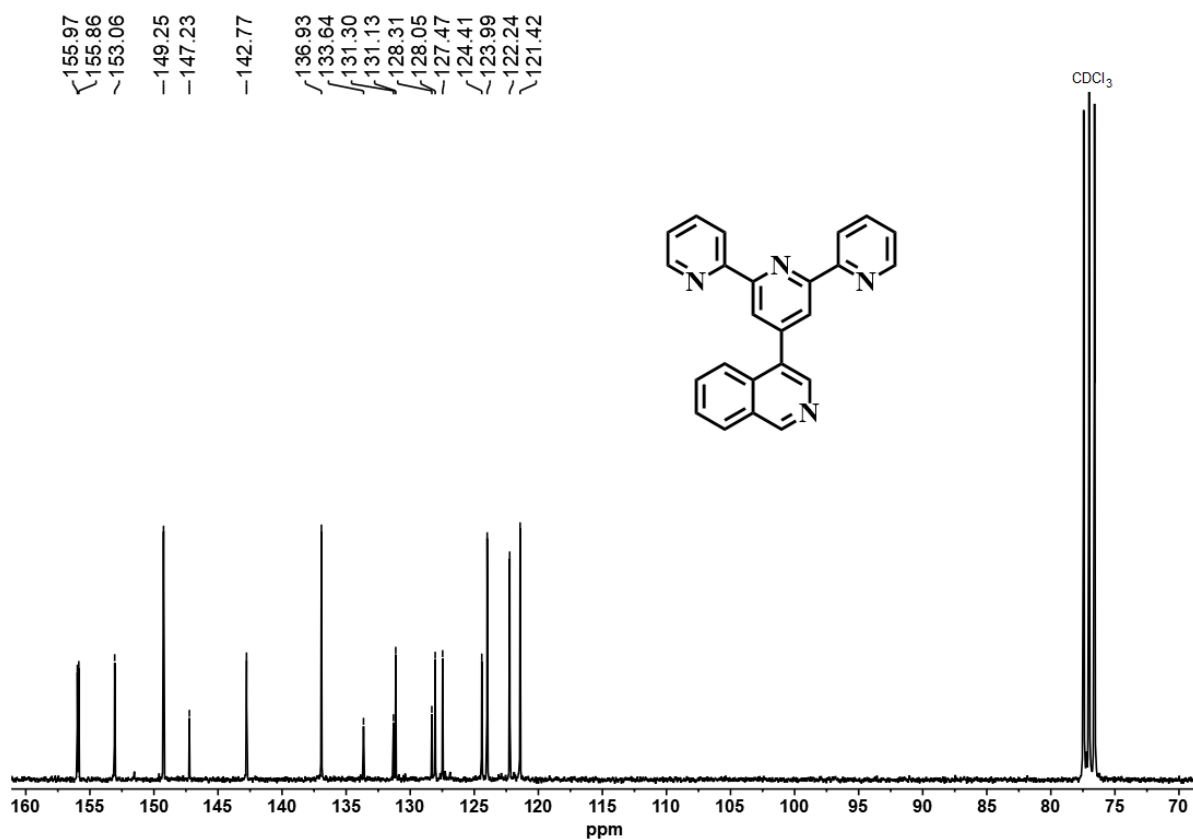

**Fig. S2.** <sup>13</sup>C NMR (75 MHz, 25°C) spectrum of **terpy-4-isoquinoline** in CDCl<sub>3</sub>.



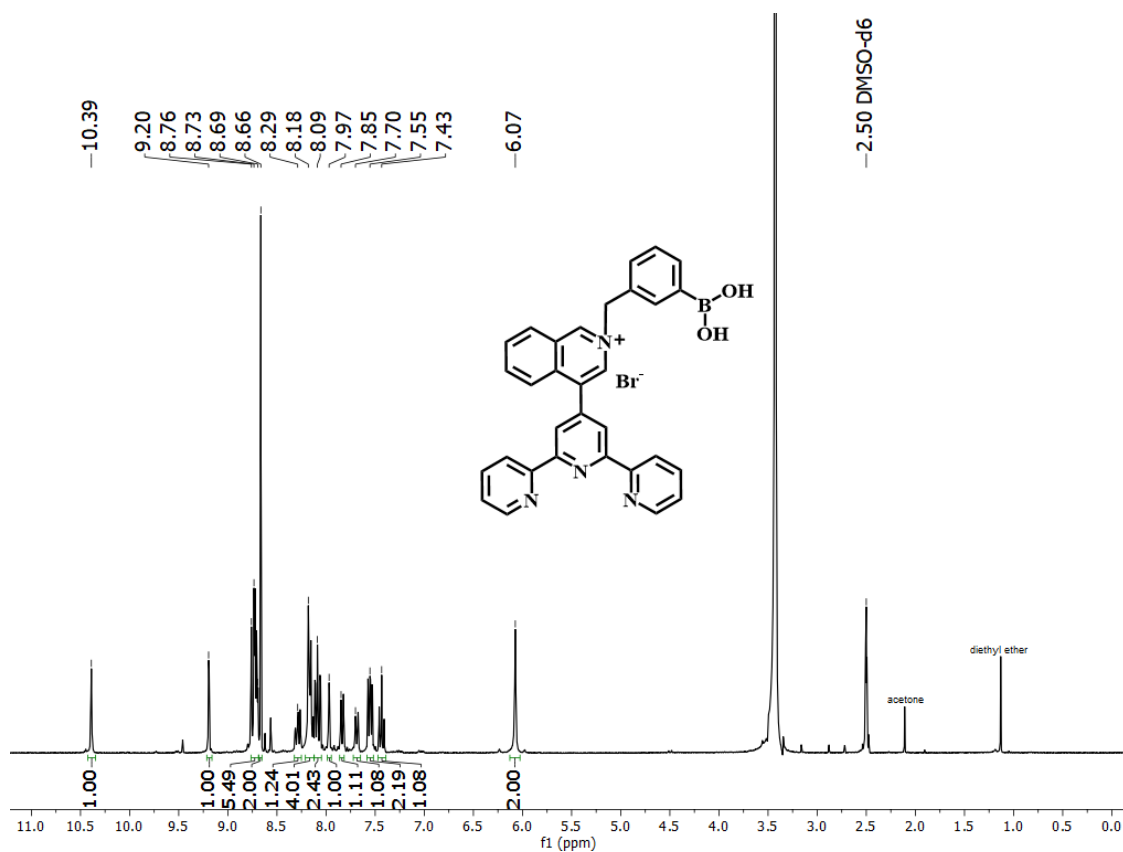

Fig. S3  $^1\text{H}$  NMR (300 MHz, 25°C) spectrum of  $L^1$  in  $\text{DMSO-}d_6$ .

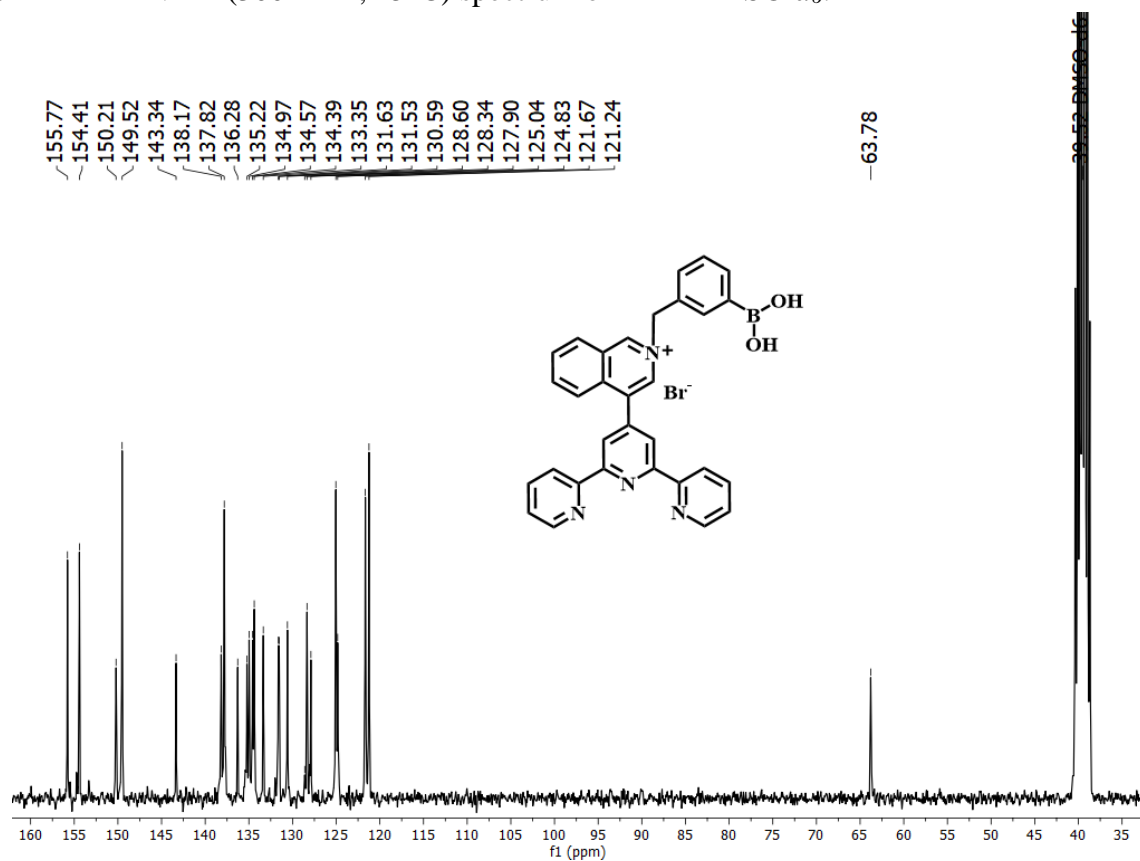

Fig. S4  $^{13}\text{C}$  NMR (75 MHz, 25°C) spectrum of  $L^1$  in  $\text{DMSO-}d_6$ .

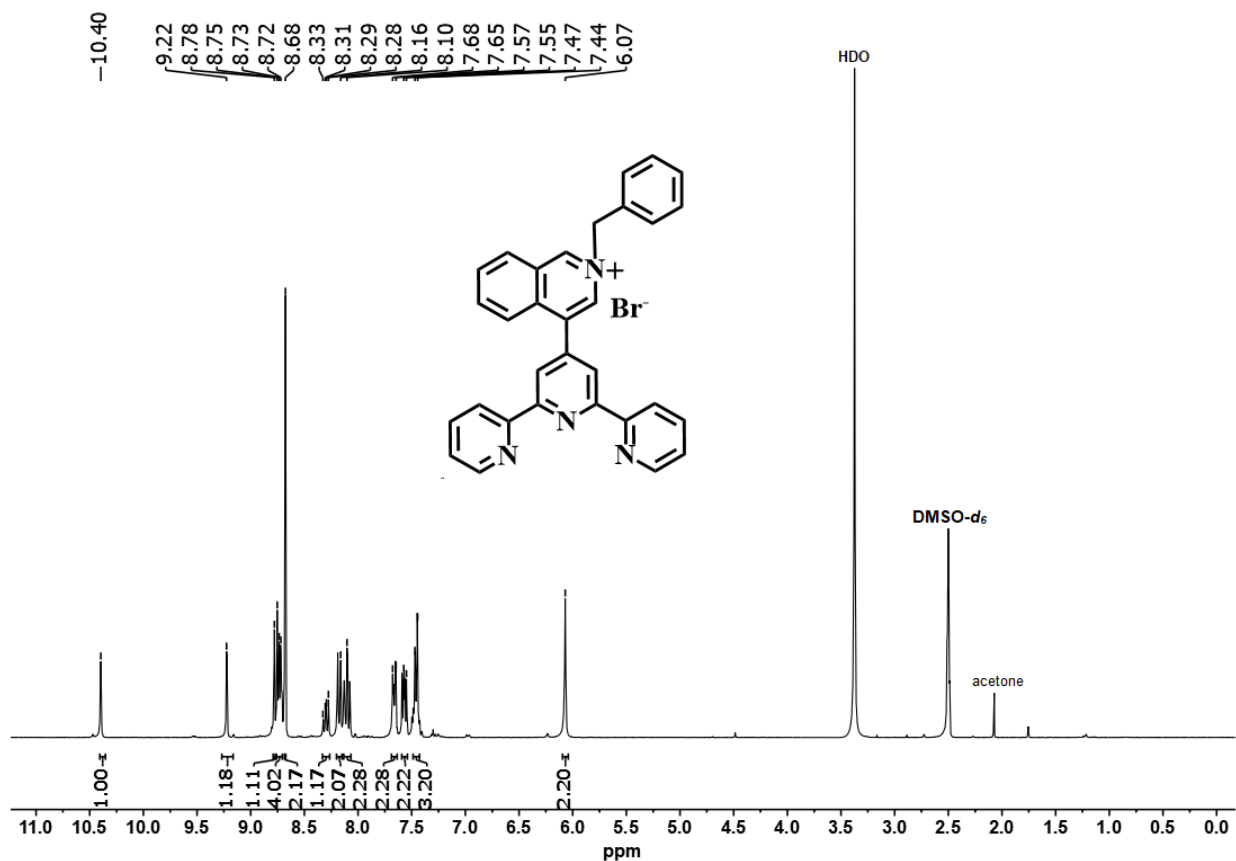

Fig. S5  $^1\text{H}$  NMR (300 MHz, 25°C) spectrum of  $L^2$  in  $\text{DMSO-}d_6$ .

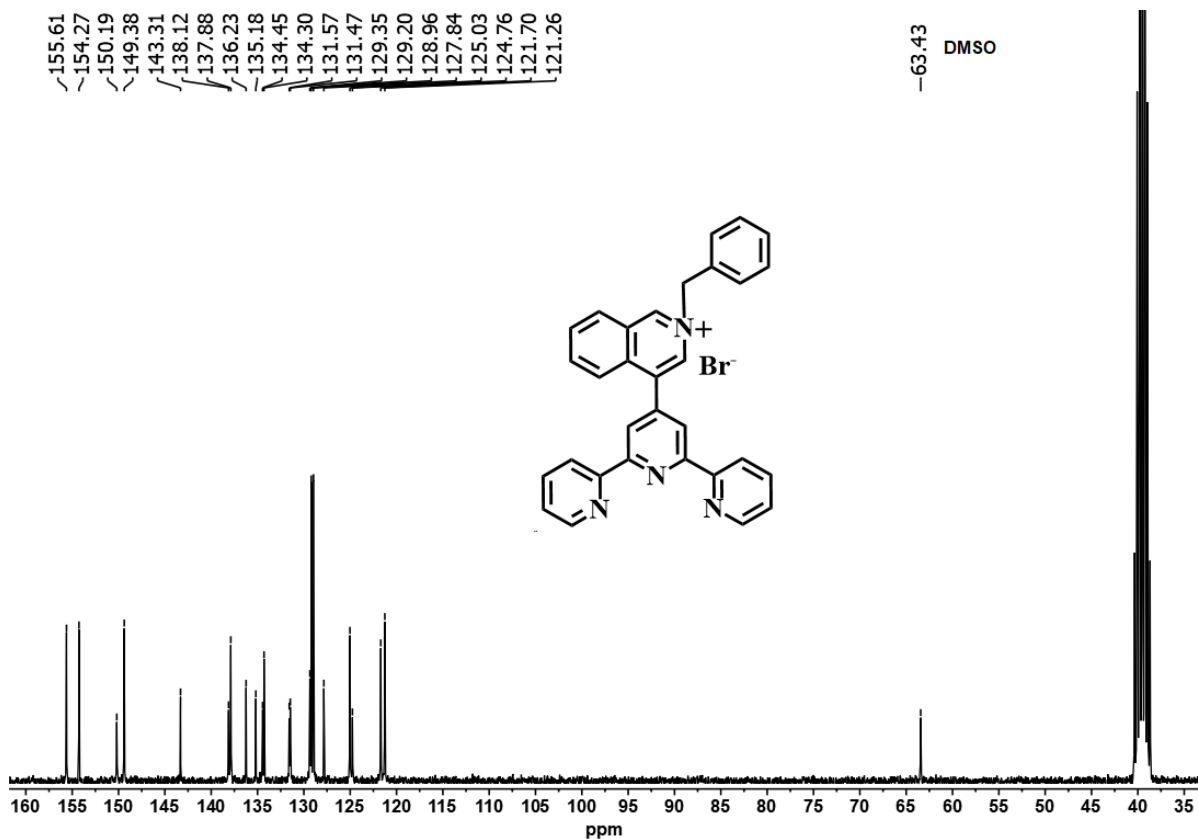

Fig. S6  $^{13}\text{C}$  NMR (75 MHz, 25°C) spectrum of  $L^2$  in  $\text{DMSO-}d_6$ .

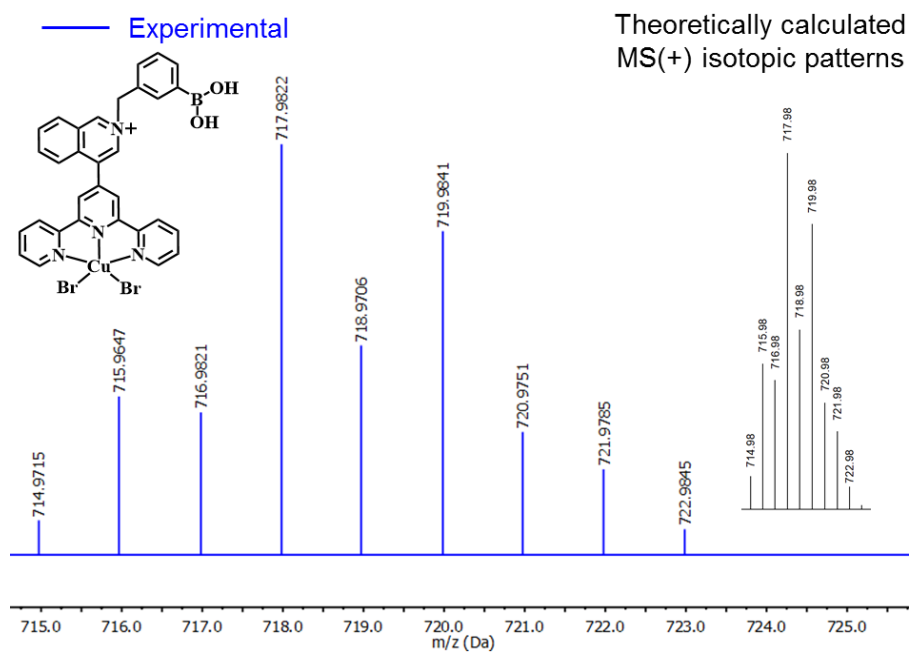

**Fig. S7** High-resolution mass spectrum by a positive scan of ESI of **CuL<sup>1</sup>** in CH<sub>3</sub>OH. Inset: theoretically calculated MS isotopic patterns.

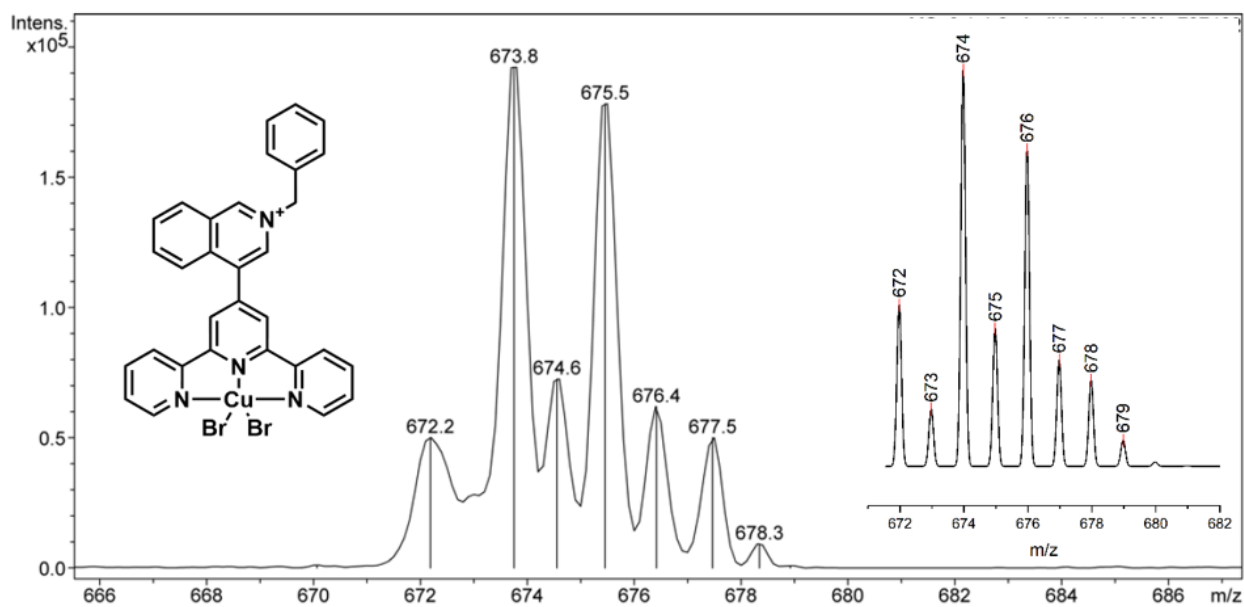

**Fig. S8** Positive scan MS-ESI spectrum of **CuL<sup>2</sup>** in CH<sub>3</sub>OH.

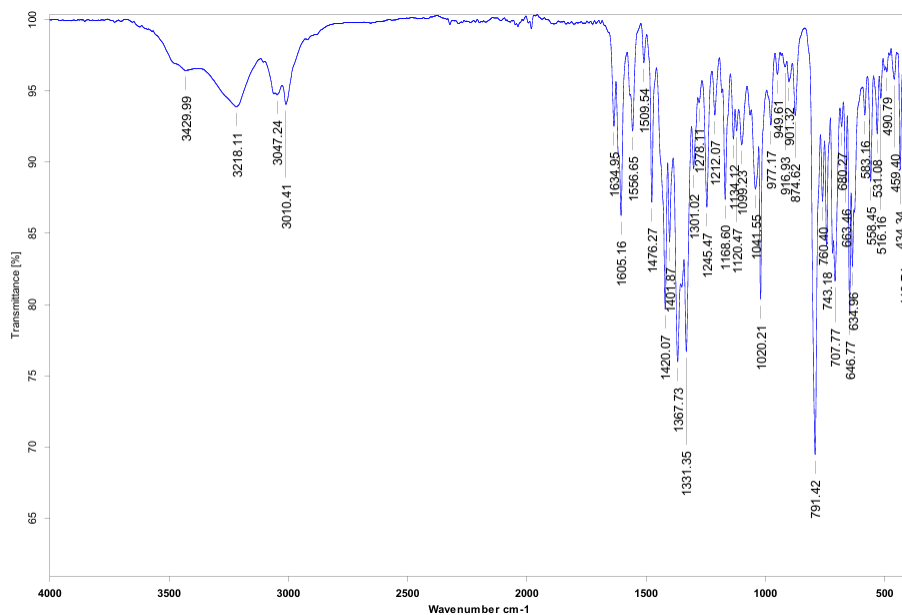

Fig. S9 IR (ATR) spectrum of **CuL<sup>1</sup>**.

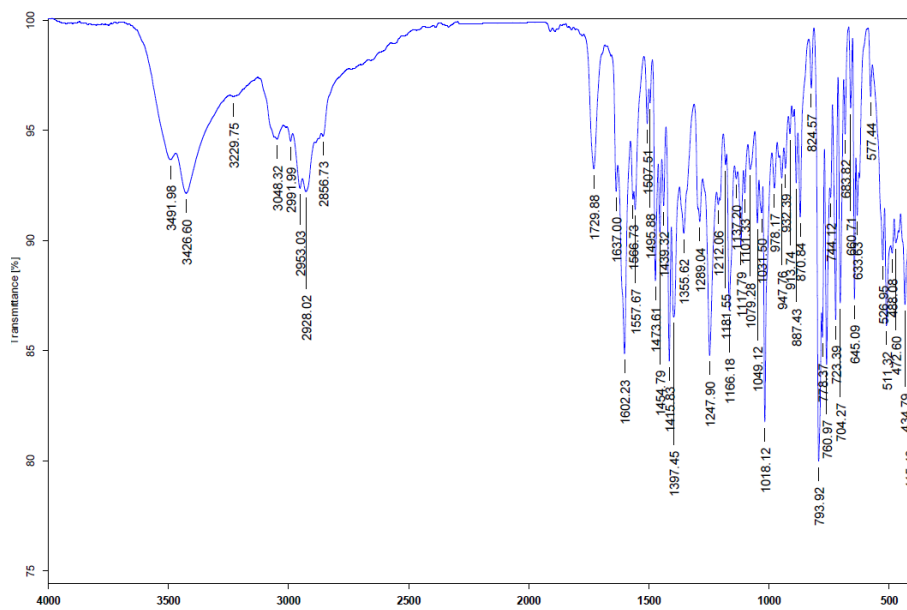

Fig. S10 IR (ATR) spectrum of **CuL<sup>2</sup>**.



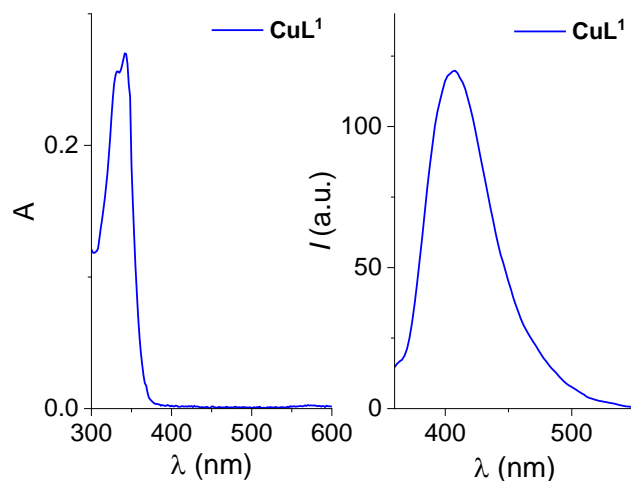

**Fig. S13** Absorption (20  $\mu\text{M}$ ) and fluorescence emission spectra (10  $\mu\text{M}$ ,  $\lambda_{\text{ex}}= 330 \text{ nm}$ ) of **CuL<sup>1</sup>** in buffered water at pH= 7.4.

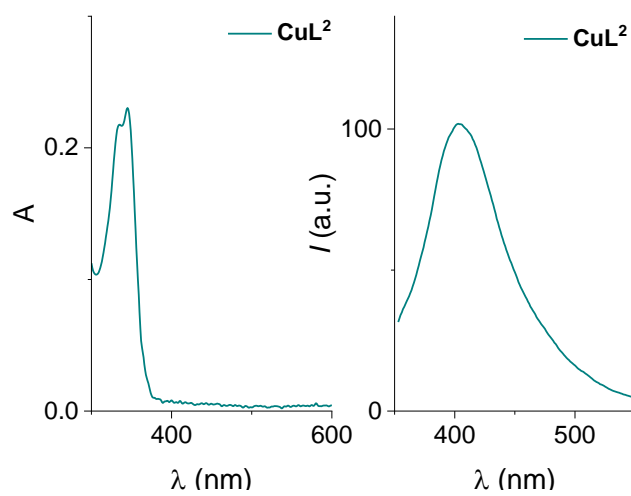

**Fig. S14** Absorption (20  $\mu\text{M}$ ) and fluorescence emission spectra (10  $\mu\text{M}$ ,  $\lambda_{\text{ex}}= 330 \text{ nm}$ ) of **CuL<sup>2</sup>** in buffered water at pH= 7.4.

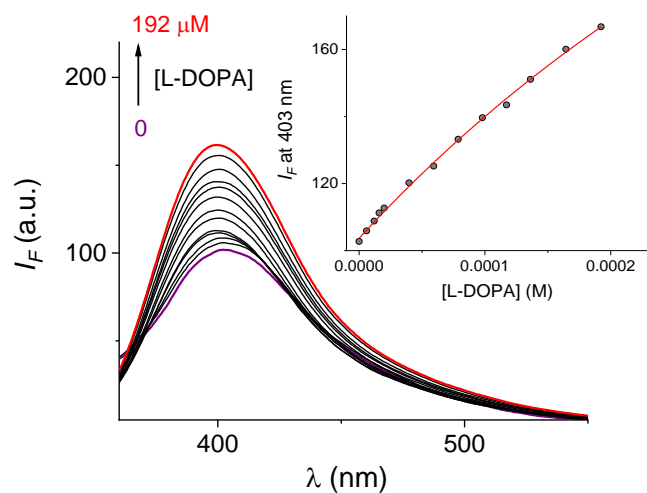

**Fig. S15** Changes of emission spectra ( $\lambda_{\text{ex}}=330\text{ nm}$ ) of buffered (10 mM MOPS pH= 7.4, 20 mM NaCl) aqueous solutions of **CuL<sup>2</sup>** (10  $\mu\text{M}$ ) upon the addition of increasing amounts of Levodopa at 25  $^{\circ}\text{C}$ . Inset: Curve-fitting analysis of the fluorescence emission change at 403 nm. The solid line was obtained by fitting the experimental data to 1:1 model.
